# Supplementary material
Source: publisher site journal article supplement (https://www.degruyter.com/publication/journal_key/LIBR/downloadAsset/LIBR_Instructions%20for%20Authors.pdf)
Supplement: Supplementary file 1 [file LIBR_Instructions%20for%20Authors.pdf]

## INSTRUCTIONS FOR AUTHORS

### *Aim and scope*

*Libri* reports on current trends in library and information studies worldwide and describes their resulting transformation from the introduction of new information and communication technologies, multidisciplinary approaches, changing practices, and evolving methods. Background information and the latest research findings in library and information studies are made accessible to academics, practitioners, and a broader public. Topics that are covered include, but are not limited to:

- ⊗ Libraries (national, public, academic, school, special, etc.) and other information environments
- ⊗ Information and knowledge management
- ⊗ Information behaviour
- ⊗ Information needs, seeking, searching and use
- ⊗ Information retrieval
- ⊗ Emerging technologies, including AI, AR, VR etc., from an Information Science perspective?
- ⊗ Information for development (developing and industrialized countries)
- ⊗ Indigenous knowledge
- ⊗ Literacy (media, information, etc.)
- ⊗ Data science, data analytics, big data and their impact on organisations (e.g., customer related data; social science perspective)
- ⊗ Digital libraries and repositories
- ⊗ Data science, data management, data curation and virtual research environments (VREs)
- ⊗ Information ethics, policy and law
- ⊗ Scholarly communication
- ⊗ Open science, open access and related topics
- ⊗ Health information
- ⊗ Information science
- ⊗ Information services
- ⊗ Information in society
- ⊗ Electronic Data Interchange (EDI)
- ⊗ Information organization and representation
- ⊗ Freedom of access to information and freedom of expression
- ⊗ Archives & preservation
- ⊗ Cultural heritage
- ⊗ Book and publishing theory and history
- ⊗ LIS education
- ⊗ International and comparative LIS research
- ⊗ Research methodologies in LIS
- ⊗ Theory submissions

(We do not publish articles on scientometrics, bibliometrics, webometrics, altmetrics etc., as there are a number of specialist journals that do so.)

### *Length of papers*

*Libri* publishes original, peer-reviewed scholarly articles, which should be 5,000–7,000 words in length (excluding the abstract, tables and list of references). Papers that fall outside these guidelines will be rejected. Exceptionally, longer articles (up to 10,000 words) may be considered suitable.

### *Content*

Papers should demonstrate:

- ⊗ awareness of both grounding/foundational and recent literature on the topic
- ⊗ critical analysis of the facts, opinions and procedures relevant to the topic
- ⊗ appropriate research methodology and design
- ⊗ a balanced discussion of the evidence and its implications
- ⊗ cogency of argument
- ⊗ a clear and coherent structure.

Authors should provide sufficient background information about the activity or country to enable the context to be easily understood by readers not familiar with it. Papers should be preceded by an unstructured abstract of approximately 150-200 words, and 3-6 keywords.

#### *Plagiarism and patch-writing*

Plagiarism and patch-writing are not acceptable. All content not the author's own intellectual thought (even if the content paraphrases intellectual property of other researchers) should be properly referenced. All manuscripts are automatically put through similarity detection software, and the results are evaluated by the editors. Manuscripts containing plagiarised material or (excessive) patch-writing will be rejected, without the option of revision or resubmission.

#### *Copyright*

Authors submitting a paper do so on the understanding that the work has not been published before in English, is not being considered for publication elsewhere, and has been read and approved of by all its authors. Authors submitting papers for publication warrant that the work does not infringe any existing copyright, and indemnify the publisher against any such infringement.

The submission of the manuscript means that the authors automatically agree to assign exclusive copyright to De Gruyter Saur for printed and electronic versions of *Libri* if the manuscript is accepted for publication. The work shall not be published elsewhere in any language without the written consent of the publisher. The articles published in this journal are protected by copyright, which covers translation rights and the exclusive right to reproduce and distribute all of the articles printed in the journal. No material published in the journal may be stored on microfilm or videocassettes or in electronic databases and the like or reproduced photographically without the prior written consent of the publisher.

#### *Language*

The language of publication is English. Papers submitted by authors whose first language is not English may be required to have their manuscript copy-edited by a proficient English copy-editor and are subject, as an integral part of the editorial process, to any minor grammatical and linguistic corrections that are necessary to meet the traditional high standards of academic writing of the journal.

#### *References*

References in the text to sources that authors have used should be given in parentheses following the referenced text, and should indicate the author (or significant title words) and date of publication, e.g. (Martin 2019). If there are more than three authors, use the first author followed by et al. in parentheses, e.g. (Mantel et al. 2021). The author should provide a reference list containing the full citations for the publications to which the author has referred within the paper, and ensure that bibliographical details are complete and correct. In the reference list the use of et al. is prohibited and all authors must be named. Please refer to the sample reference entries below.

#### *Tables and illustrations*

Tables, figures (charts, diagrams, etc.) and other illustrations should be provided as electronic files accompanying the article. Figures and illustrations are published in colour or black and white.

#### *Section headings*

Section headings must be numbered and should follow the following numbering system:

- 1 First-level heading
- 1.1 Second-level heading
- 1.1.1 Third-level heading

#### *Submission of papers*

*Libri* uses an electronic editorial management system, ScholarOne Manuscripts, available at <https://mc.manuscriptcentral.com/libri>. Authors are required to create an account and log in to submit a paper. Instructions on how to submit a paper are available once an author has logged in. ScholarOne permits authors to monitor the progress of their papers through the editorial and publication process.

Authors are required to ensure their paper complies with all instructions and make any necessary amendments before submitting the text.

#### *Double-blind peer review*

Libri makes use of a double-blind peer review process. Authors are required to ensure that their manuscript is anonymized before submitting it.

#### *Offprints*

Upon publication, authors will receive electronic offprints (in PDF format) of their contribution.

#### *Address*

Business communications should be sent to:

*Libri, International Journal of Libraries and Information Studies*

Walter de Gruyter GmbH

Neumarkter Str. 28

81673 München

Deutschland/Federal Republic of Germany

Phone +49(0)89-76902-441

Email: florian.hoppe@degruyter.com

## SAMPLE REFERENCE ENTRIES

### In-text citation

|                                                                                                     | Direct citation                                                                                                                                  | Indirect citation                                                                                                       |
|-----------------------------------------------------------------------------------------------------|--------------------------------------------------------------------------------------------------------------------------------------------------|-------------------------------------------------------------------------------------------------------------------------|
| Single author                                                                                       | O'Quigley (2000)                                                                                                                                 | (O'Quigley 2000)                                                                                                        |
| Page Range - only if the sources have page numbers, which is usually not the case for websites etc. | O'Quigley (2000, 9-15) formulates this as follows: "[...]"<br><br>Wald (2021, 243-45) discussed this in detail in the section that deals with... | [...] (O'Quigley 2000, 9-15)<br><br>Wald discussed this in detail in the section that deals with... (Wald 2021, 243-45) |
| Single author: multiple articles in different years                                                 | [order given in manuscript will not be altered]                                                                                                  | (Wald 2019; Wald 2021)                                                                                                  |
| Single author: multiple articles in one year                                                        | [order given in manuscript will not be altered]                                                                                                  | (Wald 2021a; Wald 2021b)                                                                                                |
| Two authors                                                                                         | Greenland and Maldonado (1994)                                                                                                                   | (Greenland and Maldonado 1994)                                                                                          |
| Three authors                                                                                       | Robins, Breslow, and Greenland (1986)                                                                                                            | (Robins, Breslow, and Greenland 1986)                                                                                   |
| More than three authors                                                                             | Mantel et al. (1977)                                                                                                                             | (Mantel et al. 1977)                                                                                                    |
| Series of references                                                                                | [order given in manuscript will not be altered]                                                                                                  | [Alphabetical order]<br><br>(Fujii and Yanagimoto 2005; Sato 1990; Yanagimoto 1990)                                     |
| Same author group with different years                                                              | Smith et al. (1985, 1986)                                                                                                                        | (Smith et al. 1985, 1986)                                                                                               |
| Same author group with same year                                                                    | Lawrence and David (2009a, 2009b)                                                                                                                | (Lawrence and David 2009a, 2009b)                                                                                       |
| First releases                                                                                      | Mansfield ([1922] 1993)                                                                                                                          | (Mansfield [1922] 1993)                                                                                                 |
| Author (with same surname and different initials) with same year                                    | [order given in manuscript will not be altered]<br><br>T. H. E. Smith et al. (2003) and A. Smith et al. (2003)                                   | [Alphabetical order]<br><br>(A. Smith et al. 2003; T. H. E. Smith et al. 2003)                                          |

## Reference list

### General remarks

Entries are in alphabetical order.

DOIs must be provided wherever available. If no DOI is available for a journal or magazine article, the URL and access date must be included, e.g.:

Farkas, M. 2017. "Never Neutral: Critical Librarianship and Technology." *American Libraries*.  
<https://americanlibrariesmagazine.org/2017/01/03/never-neutral-critlib-technology/> (accessed January 7, 2021).

For all documents on the web that do not have a DOI a URL and access date must be provided.

Short URLs (e.g., URLs with bit.ly, tinyurl, shortURL etc.) are not acceptable and the full URL must be provided.

### Journal

Kamtekar, R. 2016. "The Soul's (After-) Life." *Ancient Philosophy* 36 (6): 115–32. <https://doi.org/10.1086/690235>.

### Multiple articles by the same author in different years

[chronologically from old to new]

Wald, C. 2012. "'Medieval Shakespeare?': Introduction." *Shakespeare* 8 (4): 351–5.  
<https://doi.org/10.1080/17450918.2012.731703>.

Wald, C. 2021. "The Spectral Returns of *The Merchant of Venice* in Marina Carr's *Portia Coughlan*: 'Only his shadow?'" *Shakespeare Bulletin* 39 (2): 241–60. <https://doi.org/10.1353/shb.2021.0023>.

### Multiple articles by the same author in one year

[alphabetized by title]

Wald, C. 2021a. "The Spectral Returns of *The Merchant of Venice* in Marina Carr's *Portia Coughlan*: 'Only his shadow?'" *Shakespeare Bulletin* 39 (2): 241–60. <https://doi.org/10.1353/shb.2021.0023>.

Wald, C. 2021b. "'Why Didn't You Just Stay Where You Were, a Relic in the Memory of Poets?': Yoruban Ritual and Sororal Commonality in Fémi Ôsófisan's *Tègònni: An African Antigone*." *The Journal of Commonwealth Literature* 56 (2): 201–17. <https://doi.org/10.1177/0021989418773142>.

### Journal with supplement

Agha, A. 2015. "Tropes of Branding in Forms of Life." In "The Semiotic Corporation," edited by K.-N. Koh and G. Urban. Supplement, *Signs and Society* 3, no. S1: S174–94. <https://doi.org/10.1086/679004>.

### Corporate publication

IFLA. 2021. *IFLA Annual Report 2020*. The Hague: International Federation of Library Associations and Institutions (IFLA). <https://repository.ifla.org/handle/123456789/1095> (accessed April 26, 2021).

### et al. usage (not allowed – all the authors are included)

Wolchik, S. A., S. G. West, I. N. Sandler, J. Tein, D. Coatsworth, L. Lengua, and W. A. Griffin. 2000. "An Experimental Evaluation of Theory-Based Mother and Mother-Child Programs for Children of Divorce." *Journal of Consulting and Clinical Psychology* 68 (5): 843–56. <https://doi.org/10.1037/0022-006X.68.5.843>.

### Epub ahead of print (DOI)

Tang, R., and K. E. Oh. 2022. "The Impact of Types of News on Mobile News Consumption Behavior: A Mixed-Method Research." *Libri*. <https://doi.org/10.1515/libri-2021-0071>

## Reference – forthcoming

Choi, S., D. Furceri, Y. Huang, and P. Loungani. Forthcoming. "Aggregate Uncertainty and Sectoral Productivity Growth: The Role of Credit Constraints." *Journal of International Money and Finance*.

## Book/monograph

Reeve, C. D. C. 1989. *Socrates in the Apology*. Indianapolis: Hackett Publishing.

## Book with edition

Scherer, F., and D. Ross. 1990. *Industrial Market Structure and Economic Performance*, 3rd ed. Boston: Houghton Mifflin.

## Edited book

Parker, R. H., and G. C. Harcourt, eds. 1969. *Readings in the Concept and Measurement of Income*. London: Cambridge University Press.

## Edited book with chapter title and editors

Annas, J. 2015. "Plato's Defense of Justice: The Wrong Kind of Reason?" In *The Quest for the Good Life: Ancient Philosophers on Happiness*, edited by E. K. Øyvind Rabbås, H.F. Emilsson, and M. Tuominen, 275–94. Oxford: Oxford University Press.

## Book series

Stole, L. 2007. "Price Discrimination and Competition." In *Handbook of Industrial Organization*, Vol. 3, edited by M. Armstrong, and R. H. Porter, 2221–99. Amsterdam: Elsevier Science Publishers B.V.

Piosik, M., J. Taborek, and M. Woźnicka, eds. 2021. *Korpora in der Lexikographie und Phraseologie*. Lexicographica. Series Major, Vol. 160. Berlin, Boston: De Gruyter. <https://doi.org/10.1515/9783110716955>.

Fuertes-Olivera, P. A., and S. Tarp. 2014. *Theory and Practice of Specialised Online Dictionaries: Lexicography versus Terminography*. Lexicographica. Series Major, Vol. 146. Berlin, Boston: De Gruyter. <https://doi.org/10.1515/9783110349023>.

## Websites

Evstatieva, M. 2020. "Anatomy of a COVID-19 Conspiracy Theory." *NPR All Things Considered*. <https://www.npr.org/2020/07/10/889037310/anatomy-of-a-covid-19-conspiracy-theory> (accessed January 7, 2021).

Williams, L. 2014. "Library Programming: Don't Just Follow the Crowd." *Illinois Library Association Reporter* 32: 18–20. [https://www.ila.org/content/documents/Reporter\\_1014.pdf](https://www.ila.org/content/documents/Reporter_1014.pdf) (accessed May 10, 2019).

## Web documents

American Library Association. 2014. *National Impact of Library Public Programs Assessment: White Paper*. American Library Association. [https://nilppa.org/wp-content/uploads/2014/NILPPA\\_White\\_Paper\\_FINAL\\_web.pdf](https://nilppa.org/wp-content/uploads/2014/NILPPA_White_Paper_FINAL_web.pdf) (accessed July 1, 2019).

## Proceedings/Conferences

Herculano-Houzel, S., C. E. Collins, P. Wong, J. H. Kaas, and R. Lent. 2008. "The Basic Nonuniformity of the Cerebral Cortex." In *Proceedings of the Seventh International Conference on Enterprise Information Systems, Miami, FL, 97–108*. Berlin: Springer-Verlag. <https://doi.org/10.1073/pnas.0805417105>.

Lee, D. J., D. Bates, C. Dromey, X. Xu, and S. Antani. 2003. "An imaging system correlating lip shapes with tongue contact patterns for speech pathology research." In: *c2003. CBMS 2003. Proceedings of the 16th IEEE Symposium on Computer-Based Medical Systems; 2003 Jun 26–27; New York*, edited by M. Krol, S. Mitra, and D. J. Lee, 307–13. Los Alamitos: IEEE Computer Society. <https://doi.org/10.1109/CBMS.2003.1212807>.

### Electronic publication with DOI

Clifford, P. G. 2021. *The China Paradox: At the Front Line of Economic Transformation*. Berlin, Boston: De Gruyter. <https://doi.org/10.1515/9783110724233>.

### Electronic publication without DOI

Kurland, P. B., and R. Lerner, eds. 1987. *The Founders' Constitution*. Chicago: University of Chicago Press. <http://press-pubs.uchicago.edu/founders/> (accessed March 9, 2022).

### Thesis/Dissertation

Rahman, M. 2013. "Using Authentic Materials in the Writing Classes: Tertiary Level Scenario." PhD diss., BRAC University. <http://dspace.bracu.ac.bd/xmlui/handle/10361/3112> (accessed December 15, 2021).

### Database

Milberger, S. 2002. *Evaluation of Violence Against Women With Physical Disabilities in Michigan, 2000–2001*. ICPSR version. Detroit: Wayne State University. Distributed by Ann Arbor, MI: Inter-University Consortium for Political and Social Research. <https://doi.org/10.3886/ICPSR03414>.

### Report

U.S. Federal Energy Regulatory Commission. 2020. *Annual Report of the U.S. Federal Energy Regulatory Commission*. Washington, D.C.: GPO. <https://www.ferc.gov/sites/default/files/2021-02/2020-Annual-Report-of-FOIA.pdf> (accessed December 15, 2021).

### Patent

Iizuka, M., and H. Tanaka. Cement admixture. US Patent 4,586,960, filed June 26, 1984, and issued May 6, 1986. <https://patft.uspto.gov/netacgi/nph-Parser?Sect1=PTO1&Sect2=HITOFF&p=1&u=/netahtml/PTO/srchnum.html&r=1&f=G&l=50&d=PALL&s1=4586960.PN> (accessed December 15, 2021).

### Standards

National Information Standards Organization. *Bibliographic References*. ANSI/NISO Z39.29-2005. Bethesda, MD: NISO, approved June 9, 2005; reaffirmed May 13, 2010. <http://www.niso.org/publications/ansiniso-z3929-2005-r2010> (accessed December 15, 2021).

### Cited film works

Weir, P., dir. *Picnic at Hanging Rock*. 1975. London: Picnic Productions, 2008. DVD.

Weir, P., dir. *The Truman Show*. 1998. Los Angeles: Paramount Pictures. 1 hr., 43 min. <https://www.netflix.com/watch/11819086> (accessed June 3, 2020).

### Social Media Sites

Chicago Manual of Style. 2015. "Is the world ready for singular they? We thought so back in 1993." Facebook, April 17, 2015. <https://www.facebook.com/ChicagoManual/posts/10152906193679151> (accessed January 21, 2022).

Souza, P. (@petesouza). 2016. "President Obama bids farewell to President Xi of China at the conclusion of the Nuclear Security Summit." Instagram photo, April 1, 2016. <https://www.instagram.com/p/BDrmfXTtNct> (accessed January 21, 2022).

### Translations

Kant, I. (1781) 1929. *Critique of Pure Reason*. Translated by N. Kemp Smith. London: Macmillan & Co., Ltd.

### Special Issues

Tomii, R., and M. Yoshimoto, eds. 2013. "Collectivism in Twentieth-Century Japanese Art." Special issue, *Positions: Asia Critique* 21, no. 2. <https://doi.org/10.1215/10679847-2018256>.

### Translated titles

Takeuchi, Y. 武内義雄. 1939. *Jukyō no seishin* 儒教の精神 [The Spirit of Confucianism]. Tōkyō: Iwanami shoten 岩波書店.
